# Supplementary material
Source: PubMed Central journal article supplement (PMC2043037)
Supplement: pbio.0050273.sg001.pdf [file pbio.0050273.sg001.pdf]

A

```

Dmel ACTTTTTGAATGATCACATGTGCTCCGATTTTCGTGTCAGTCTTGAATTTAGCATACGACCGGAAGGCTTCTGACAAAATCAGTCTA
Dsim ACTTTTTGAACGATCACATGTGCTCCGATTTTCGTGTCAGTATAGAATTTATTATACGACCGGACGGCTTCTGACAAAATCAGTCTA
Dsec ACTTTTTAAACGATCACATGTGCTCCGATTTTGTGCCAGTCTTGAATTTAGCATACGACCGGAAGGCTTCTGACAAAATCAGTCTA
Dyak ACTTTTTAATCATCACATGTGCCACGATTTTGTGTCAGTTTCGAATTTGGCATAACGACCTGAAGGCTTCTGATGAAATCAGTCTA
Dere ACTTTTTAAATGATCACATGTGCTACGATTTTCGTGTCAGTCTTCAATTTAGCATACGATCCGAGGGCTTCCAATGAAATCAGTCTA

      ▲
Dmel GCTGGAGCCTTGCTACCGTTCATACCAGTTTCTTTTCGGAATATTTTCATCTAAATTCAGTGCCTTTTCCT-AAAATTTTCCAAA
Dsim GCTGGAGCCCTGCTACCGTTCAGACCAGTTTCTTTTCGGAATATTTTCATCTAAATTCAGTGCCTTTTCCT-AAAATTTTCCAAA
Dsec GCTGGAGCCTTGCTACCGTTCAGACCAGTTTCTTTTCGGAATATTTTCATCTAAATTCAGTGCCTTTTCCT-AAAAATTTTCCAAA
Dyak GCTGGAGCCTTGCTACCGTTCGGACCAGATTCTTTTCGGAATATTTTCATCTAAATTCAGTGCCTTTTCTTAAATTTTCCAAA
Dere GCTGGGTCTTGCTACCGTTCAGACCAGTTTCTTTTCGGAATATTTTCATCTAAATTCAGTGCCTTTTCTTAAATTTTCCAAA
      ▲
      └─▶

```

B

```

Dmel TGAAGGCGTTTGAAAGCTTGTTTTATTTTCTTAAC TGCCTGTTGGCAAT TTATAATACAACAAAAA-TTAGTAAATACATGGCTA CATATCGATTT
Dsim TGAAGGCGCTTAAAGGCTTGTTTTATTTTCTTAAC TGCCTGTTGGCAAT TTATAATACAAAAA---TAAGTAAATACATGGCTA CATATCGATTC
Dsec TGAAGGCGCTTAAAGCTTGTTTTATTTTCTTAAC TGCCTGTTGGCAAT TTATAATACAAAAAATATGTAAATACATGGCTA CATATCGATTC
Dyak TGAAGGCGTTT-AAGCTTGTTAATTTTTC--AA-TGCCTGTTGGCAAT ATATTATAAAAA-CAA-AGTAAATACATGGCTA AATATC-ATTC
Dere TGAATGCGTTTAAAGCTTGTTAATTTTCAAAGC TGCCTGTTGGCAAT TTCTTATAAAAAATACAA-AGTAAATACATGGCTA AATATC-ATTC
      ▲

```

**Figure S1.** (A) Alignment of the *ocn* 5' flanking and 5' UTR sequences of *D. melanogaster*, *D. simulans*, *D. sechellia*, *D. yakuba*, and *D. erecta*. The arrowheads indicate the boundaries of the *ocn* promoter sequence included in our expression constructs. The transcriptional start site is indicated by an arrow. (B) Alignment of the *ocn* 3' UTR sequences of *D. melanogaster*, *D. simulans*, *D. sechellia*, *D. yakuba*, and *D. erecta*. The two conserved regions are shaded. The arrowheads indicate the boundaries of the 3' UTR sequence included in our expression construct.
