# Supplementary material
Source: PubMed Central journal article supplement (PMC2043037)
Supplement: pbio.0050273.sg002.pdf [file pbio.0050273.sg002.pdf]

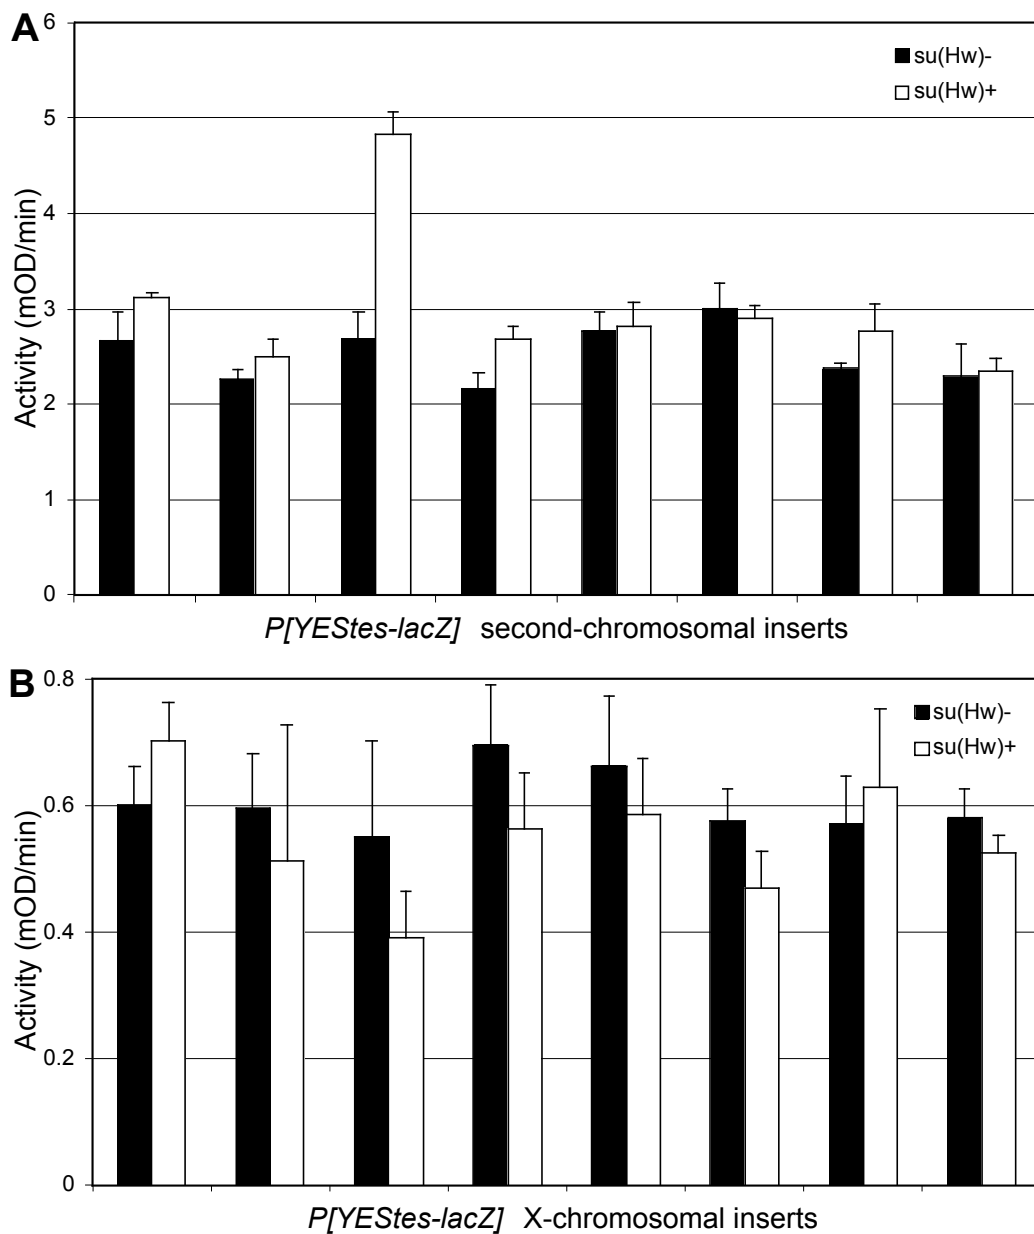

**Figure S2.** The effect of *suppressor of Hairy-wing* genetic background on *P*[YEStes-*lacZ*] transgene expression in adult males. The  $\beta$ -galactosidase activity imparted by the transgenes was measured in a background where the third chromosome was homozygous for either the mutant *su(Hw)<sup>\delta</sup>* allele (solid bars) or the wild-type allele (open bars). (A) Activity comparison of eight heterozygous second-chromosomal insertions. (B) Activity comparison of eight hemizygous X-chromosomal insertions. In both cases, the genetic background had no significant effect on activity (two-tailed Wilcoxon signed ranks test,  $P > 0.10$ ). Error bars indicate the standard error of the mean, calculated from the variance among all replicate measurements within each independent insertion line.
