# Supplementary material
Source: PubMed Central journal article supplement (PMC2043037)
Supplement: pbio.0050273.st001.pdf [file pbio.0050273.st001.pdf]

| <b>Table S1:</b> Chromosomal locations of transgene insertions |       |          |                   |             |           |               |             |
|----------------------------------------------------------------|-------|----------|-------------------|-------------|-----------|---------------|-------------|
| Line                                                           | Chrom | Cyt Band | Coordinate (v5.1) | Location    | Comment   | Proximal gene | Distal gene |
| wol12X                                                         | X     | 7B1      | 7231447*          | intergenic  |           | CG18155       | CG1435      |
| wol21X                                                         | X     | 10E3     | 11699401          | CG4147      | in exon   |               |             |
| wol13X                                                         | X     | 11E3     | 13101216          | CG1903      | in intron |               |             |
| wol23X                                                         | X     | 19F1     | 20994197          | intergenic  |           | CG15445       | CG34120     |
| wol24X                                                         | X     | 10E3     | 11687344*         | CG15224     | in intron |               |             |
| wol20X                                                         | X     | 15A7     | 16677891*         | intergenic  |           | CG9623        | CG4742      |
| wol19X                                                         | X     | 16A1     | 17197389*         | CG5445      | in exon   |               |             |
| wol25X                                                         | X     | n.m.     |                   |             |           |               |             |
| wol5X                                                          | X     | n.m.     |                   |             |           |               |             |
| wol4                                                           | 2L    | 27F4     | 7423613           | intergenic  |           | CG5261        | CG5229      |
| wol7                                                           | 2R    | 42C6     | 2603250           | CG3409      | in exon   |               |             |
| wol9                                                           | 2R    | 56E1     | 15518667*         | CG9218      | in exon   |               |             |
| wol11                                                          | 3L    | 61C9     | 749342            | intergenic  |           | CG13897       | CG1007      |
| wol6                                                           | 3L    | 66C12    | 8414592           | intergenic  |           | CG32354       | CG7037      |
| wol18                                                          | 3L    | 70F4     | 14751002*         | CG33261     | in exon   |               |             |
| wol16                                                          | 3L    | 79A2     | 21872663          | intergenic  |           | CG14563       | CG7437      |
| wol2                                                           | 3R    | 82E4     | 790802*           | heterochrom |           |               |             |
| wol1                                                           | 3R    | 84B1     | 2799036*          | intergenic  |           | CG41463       | CG41464     |
| wol14                                                          | 3R    | 85F10    | 5920571*          | intergenic  |           | CG5361        | CG6203      |
| wol3                                                           | 3R    | 89E11    | 12882012          | CG5201      | in intron |               |             |
| wol15                                                          | 3R    | 91D4     | 14743978          | CG17836     | in exon   |               |             |
| wol17                                                          | 3R    | 91F4     | 14983880*         | CG11779     | in intron |               |             |
| wol10                                                          | 2     | n.m.     |                   |             |           |               |             |
| wol8                                                           | 2     | n.m.     |                   |             |           |               |             |
| ylz22X                                                         | X     | 4F9      | 5312216           | CG3249      | in intron |               |             |
| ylz9X                                                          | X     | 5A12     | 5574020           | intergenic  |           | CG3171        | CG15779     |
| ylz20X                                                         | X     | 11E1     | 13022326          | CG32368     | in exon   |               |             |
| ylz15X                                                         | X     | 14A1     | 15834425          | CG9126      | in intron |               |             |
| ylz19X                                                         | X     | 16A1     | 17195978          | CG8649      | in exon   |               |             |
| ylz18X                                                         | X     | 16A1     | 17196628          | CG5445      | in exon   |               |             |
| ylz17X                                                         | X     | 16B10    | 17552922          | CG5870      | in intron |               |             |
| ylz16X                                                         | X     | n.m.     |                   |             |           |               |             |
| ylz21X                                                         | X     | n.m.     |                   |             |           |               |             |
| ylz23X                                                         | X     | n.m.     |                   |             |           |               |             |
| ylz6                                                           | 2L    | 23A3     | 2753160           | CG9894      | in intron |               |             |
| ylz4                                                           | 2L    | 24C2     | 3730445           | intergenic  |           | CG2822        | CG10019     |
| ylz11                                                          | 2R    | 41F9     | 1642051           | CG12792     | in exon   |               |             |
| ylz10                                                          | 2R    | 42C3     | 2549792           | CG15845     | in exon   |               |             |
| ylz5                                                           | 2R    | 43E16    | 3670803           | CG1555      | in exon   |               |             |
| ylz7                                                           | 2R    | 50A13    | 9389601           | CG6033      | in exon   |               |             |
| ylz3                                                           | 2R    | 53F8     | 12984754          | CG8938      | in intron |               |             |
| ylz12                                                          | 3L    | 61C9     | 749342            | intergenic  |           | CG13897       | CG1007      |
| ylz13                                                          | 3L    | 66D8     | 8609567           | CG6282      | in exon   |               |             |
| ylz8                                                           | 3L    | 76C5     | 19784609          | CG8742      | in exon   |               |             |
| ylz1                                                           | 2     | n.m.     |                   |             |           |               |             |
| ylz2                                                           | 3     | n.m.     |                   |             |           |               |             |
| wol = <i>P[wFl-ocn-lacZ]</i> , ylz = <i>P[YEStes-lacZ]</i>     |       |          |                   |             |           |               |             |
| n.m. = not mapped by inverse PCR                               |       |          |                   |             |           |               |             |
| * = approximate location, precise insertion site not obtained  |       |          |                   |             |           |               |             |
